# Supplementary material for: Molecular mechanism underlying regulation of Arabidopsis CLCa transporter by nucleotides and phospholipids
Source: PubMed Central journal article supplement (PMC10423218; doi:10.1038/s41467-023-40624-z), 2023-08-12
Supplement: 41467_2023_40624_MOESM1_ESM.pdf [file 41467_2023_40624_MOESM1_ESM.pdf]

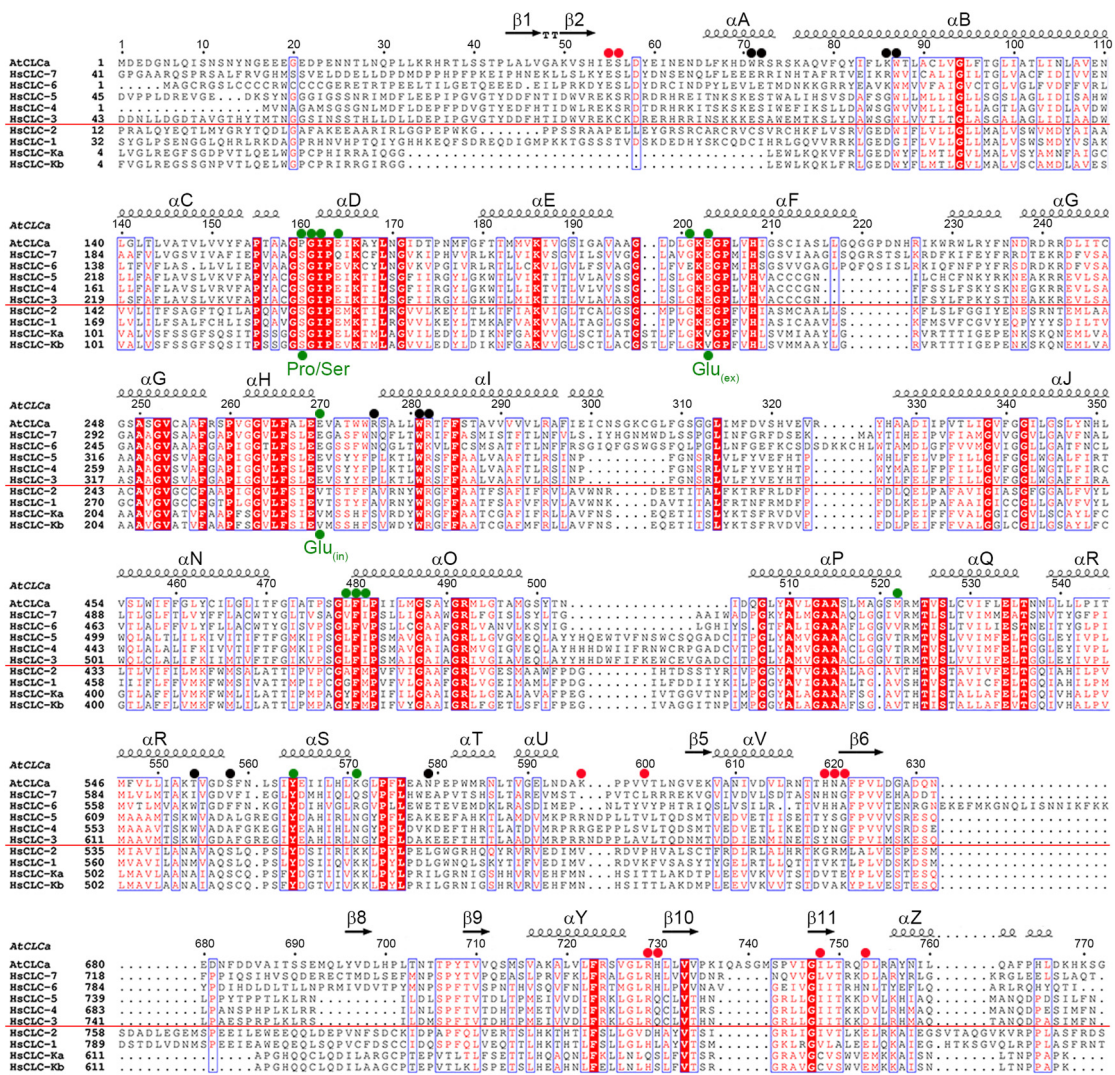

Supplementary Fig. 1 | Sequence alignment of CLC homologues.

At: *Arabidopsis thaliana*; Hs, *Homo sapiens*. The green, red and black dots indicate the residues critical for substrate ion, ATP and PI(4,5)P<sub>2</sub>-binding sites in AtCLCa, respectively. Proteins above the red line are CLC transporters, while below the red line are CLC channels.

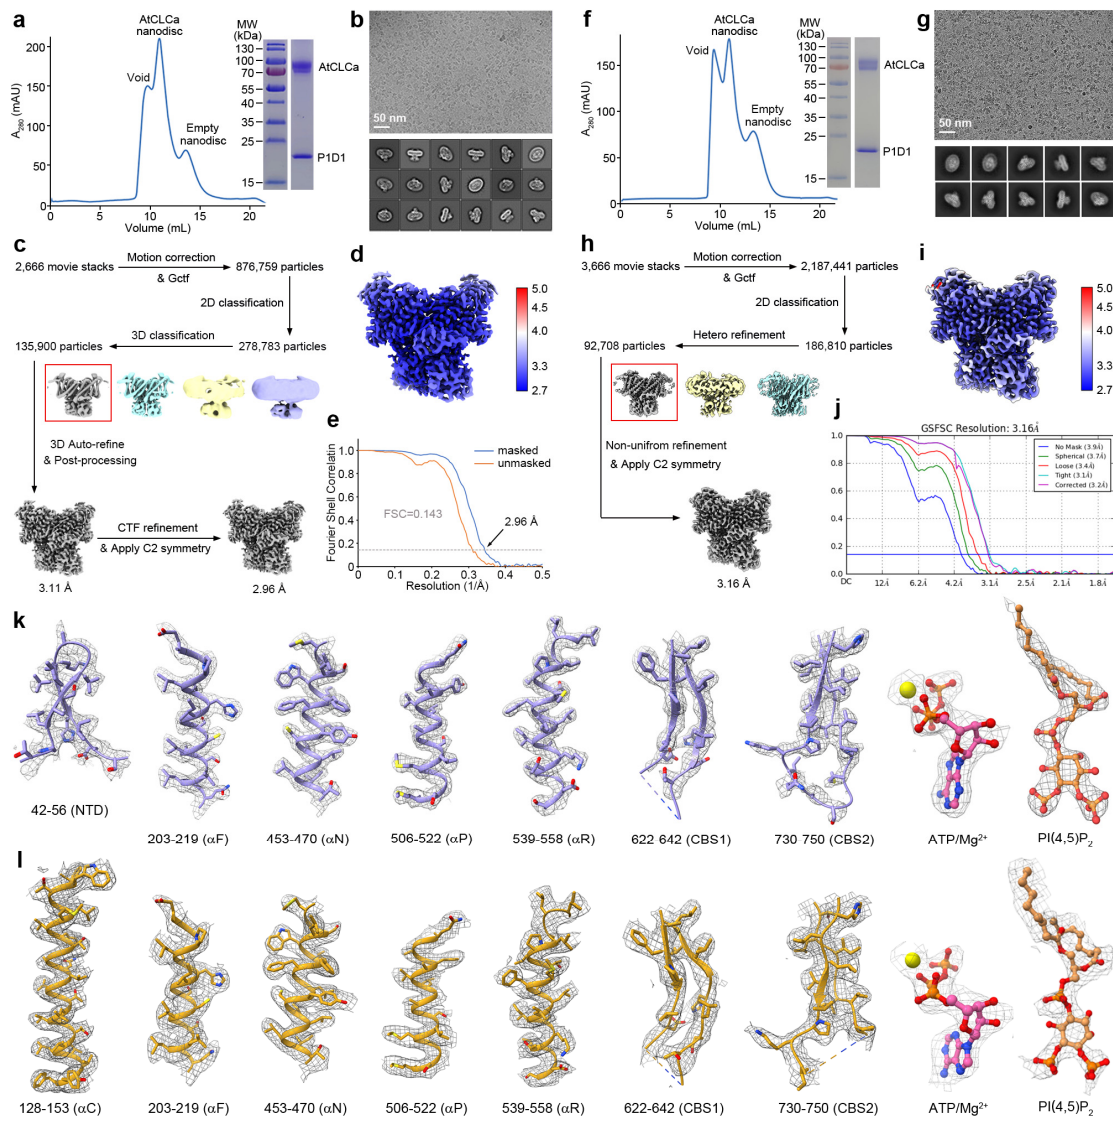

## Supplementary Fig. 2 | Cryo-EM Analysis of AtCLCa-Cl<sup>-</sup> and AtCLCa-NO<sub>3</sub><sup>-</sup>.

**a, f** Representative size-exclusion chromatogram from a Superose 200 increase gel filtration and Coomassie-blue-stained SDS-PAGE of the AtCLCa-MSP1D1 nanodiscs. The only anion in the solution buffer used in the purification is Cl<sup>-</sup> (**a**) or NO<sub>3</sub><sup>-</sup> (**f**). Independent experiments have been repeated for more than three times with similar results. **b, g** The representative cryo-EM micrograph and 2D classifications of AtCLCa-Cl<sup>-</sup> (**b**) and AtCLCa-NO<sub>3</sub><sup>-</sup> (**g**). **c, h** Flowchart for data processing of AtCLCa-Cl<sup>-</sup> (**c**) and AtCLCa-NO<sub>3</sub><sup>-</sup> (**h**). Please refer to Methods for details. **d, i** Resolution map for AtCLCa-Cl<sup>-</sup> (**d**) and AtCLCa-NO<sub>3</sub><sup>-</sup> (**i**). The labels on the right are in unit Å. **e, j** The gold-standard Fourier shell correlation (FSC) curves for the 3D reconstructions of AtCLCa-Cl<sup>-</sup> (**e**) and AtCLCa-NO<sub>3</sub><sup>-</sup> (**j**). **k** EM density of representative segments (gray mesh) in AtCLCa-Cl<sup>-</sup>. The EM density of residues 42-56 (NTD) is at a contour level of 1  $\sigma$ , and the other

EM densities are at contour levels of  $2\sigma$ . EM density of representative segments (gray mesh) in AtCLCa-NO<sub>3</sub><sup>-</sup>. The EM density of PI(4,5)P<sub>2</sub> is at a contour level of  $3\sigma$ , and the other EM densities are at contour levels of  $4.5\sigma$ . Source data are provided as a Source Data file.

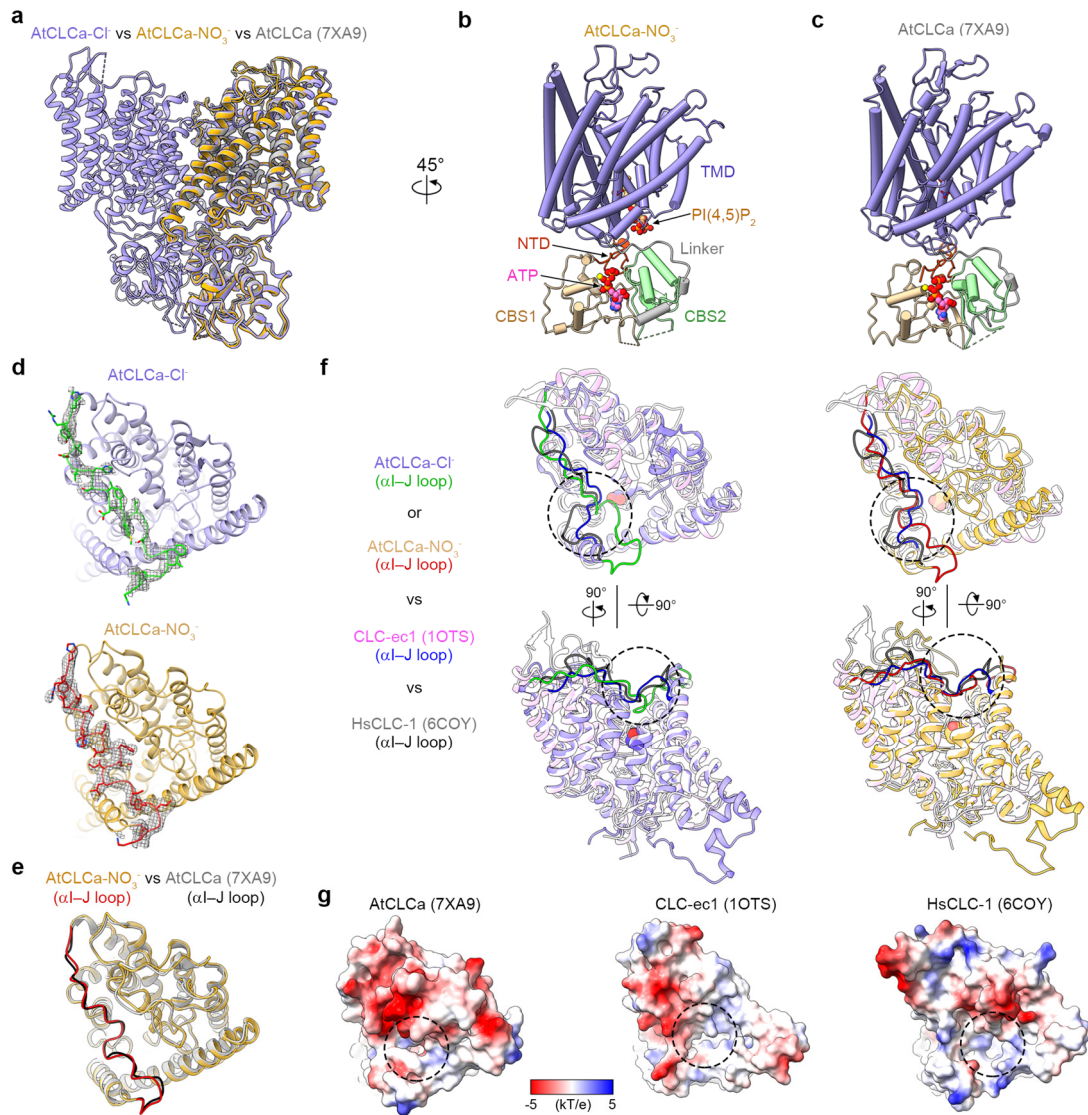

### Supplementary Fig. 3 | Conformational difference of CLCs.

**a** Comparison of AtCLCa-Cl<sup>-</sup> (blue) and AtCLCa-NO<sub>3</sub><sup>-</sup> (golden) and AtCLCa (7XA9, gray) structures. The AtCLCa-NO<sub>3</sub><sup>-</sup> protomer and AtCLCa (7XA9) protomer were superimposed onto one protomer of AtCLCa-Cl<sup>-</sup> dimer. **b** An AtCLCa-NO<sub>3</sub><sup>-</sup> protomer colored by domains. NTD, orange red; TMD, blue; Linker, gray; CBS1, beige; CBS2, green; ATP, pink spheres; PI(4,5)P<sub>2</sub>, beige spheres. **c** An AtCLCa (7XA9) protomer colored by domains as in **b**. **d** EM densities (grey mesh) of the αI-J loop in AtCLCa-Cl<sup>-</sup> and AtCLCa-NO<sub>3</sub><sup>-</sup> structures, which are at contour levels of 1.5 σ and 4.5 σ, respectively. **e** Comparison of the αI-J loop between AtCLCa-NO<sub>3</sub><sup>-</sup> and AtCLCa (7XA9). **f** Comparison of the αI-J loop between AtCLCa-Cl<sup>-</sup> or AtCLCa-NO<sub>3</sub><sup>-</sup> with CLC-ec1 (1OTS) and HsCLC-1 (6COY). The CBS domains are hidden for clearance. The side chain of gating glutamate Glu203 of AtCLCa is shown as spheres. The dashed

circle indicates segments of  $\alpha$ I–J loop near the outlet of ion transport pathway in luminal side or extracellular side. **g** Electrostatic potential surface of the AtCLCa (7XA9), CLC-ec1 (1OTS) and HsCLC-1 (6COY) protomer. The dashed circle indicates the outlet of ion transport pathway in extracellular side.

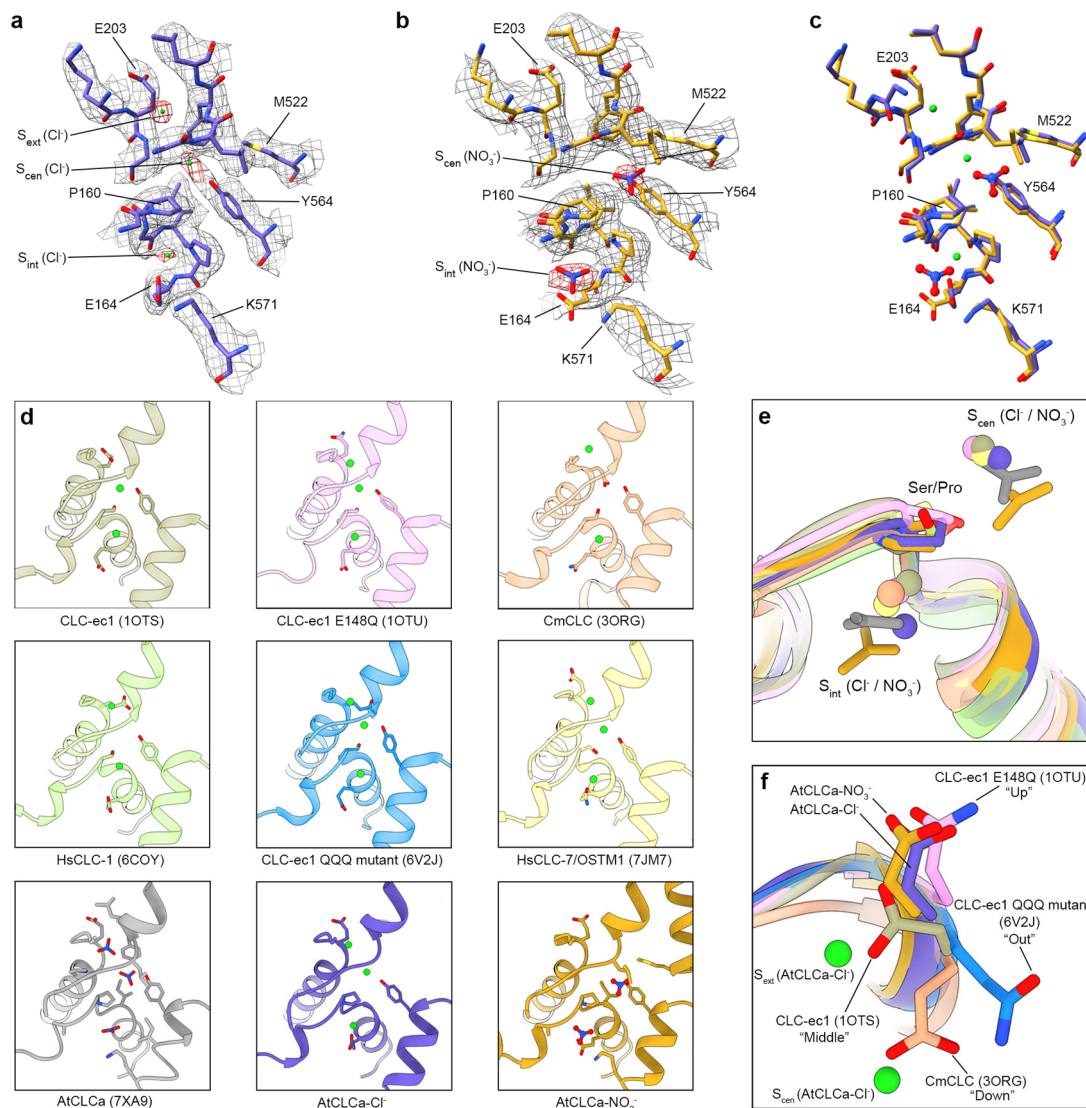

**Supplementary Fig. 4 | Substrate binding site.**

**a, b** EM densities of substrate-binding site in AtCLCa-Cl<sup>-</sup> (**a**) and AtCLCa-NO<sub>3</sub><sup>-</sup> (**b**), which are shown at the contour levels of 1.5  $\sigma$  and 3  $\sigma$ , respectively. EM densities of Cl<sup>-</sup> (**a**) and NO<sub>3</sub><sup>-</sup> (**b**) are colored red. **c** Comparison of substrate-binding site in AtCLCa-Cl<sup>-</sup> and AtCLCa-NO<sub>3</sub><sup>-</sup>. **d** Structures of substrate-binding site of CLCs. Cl<sup>-</sup>, green spheres; NO<sub>3</sub><sup>-</sup>, balls and sticks. **e** Comparison of the positions of the residue critical to selectivity, proline in AtCLCa and serine in other CLCs, colored as in **d**. **f** Comparison of the gating glutamate conformation between AtCLCa and other representative CLCs, colored as in (**d**).

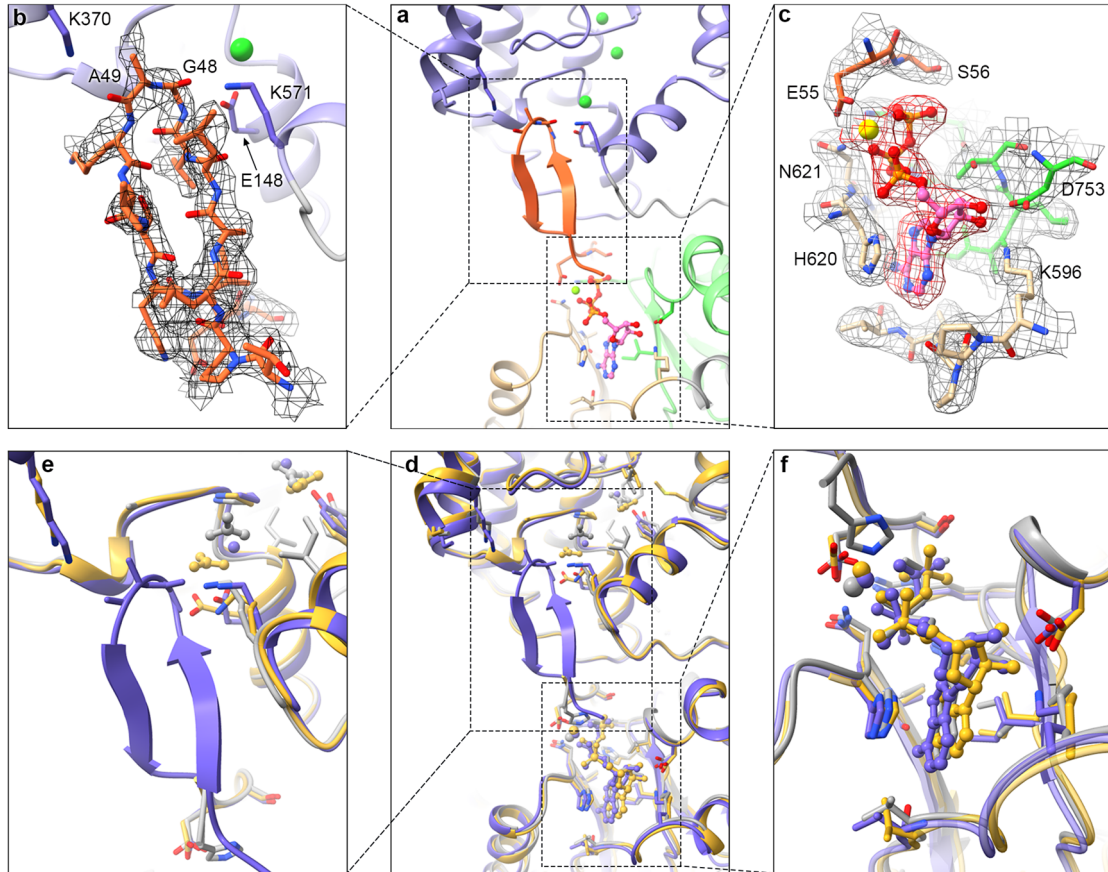

**Supplementary Fig. 5 | ATP-binding site.**

**a** N-terminal  $\beta$ -hairpin and ATP-binding site in AtCLCa-Cl<sup>-</sup> structure. NTD, orange; TMD, blue; linker, gray; CBS1, beige; CBS2, green; ATP, pink balls and sticks; Cl<sup>-</sup>, green sphere; Mg<sup>2+</sup>, yellow sphere. **b** EM density of N-terminal  $\beta$ -hairpin in AtCLCa-Cl<sup>-</sup> structure is shown at a contour level of 1  $\sigma$ . **c** EM density of ATP-binding site in AtCLCa-Cl<sup>-</sup> structure is shown at a contour level of 2  $\sigma$ . **d** Comparison of NTD and ATP-binding site between AtCLCa-Cl<sup>-</sup> (blue) and AtCLCa-NO<sub>3</sub><sup>-</sup> (golden) and AtCLCa (7XA9, gray) structures. **e** A zoom-in view of the comparison of the cytoplasmic entrance to the anion transport pathway. **f** A zoom-in view of the comparison of ATP-binding site.

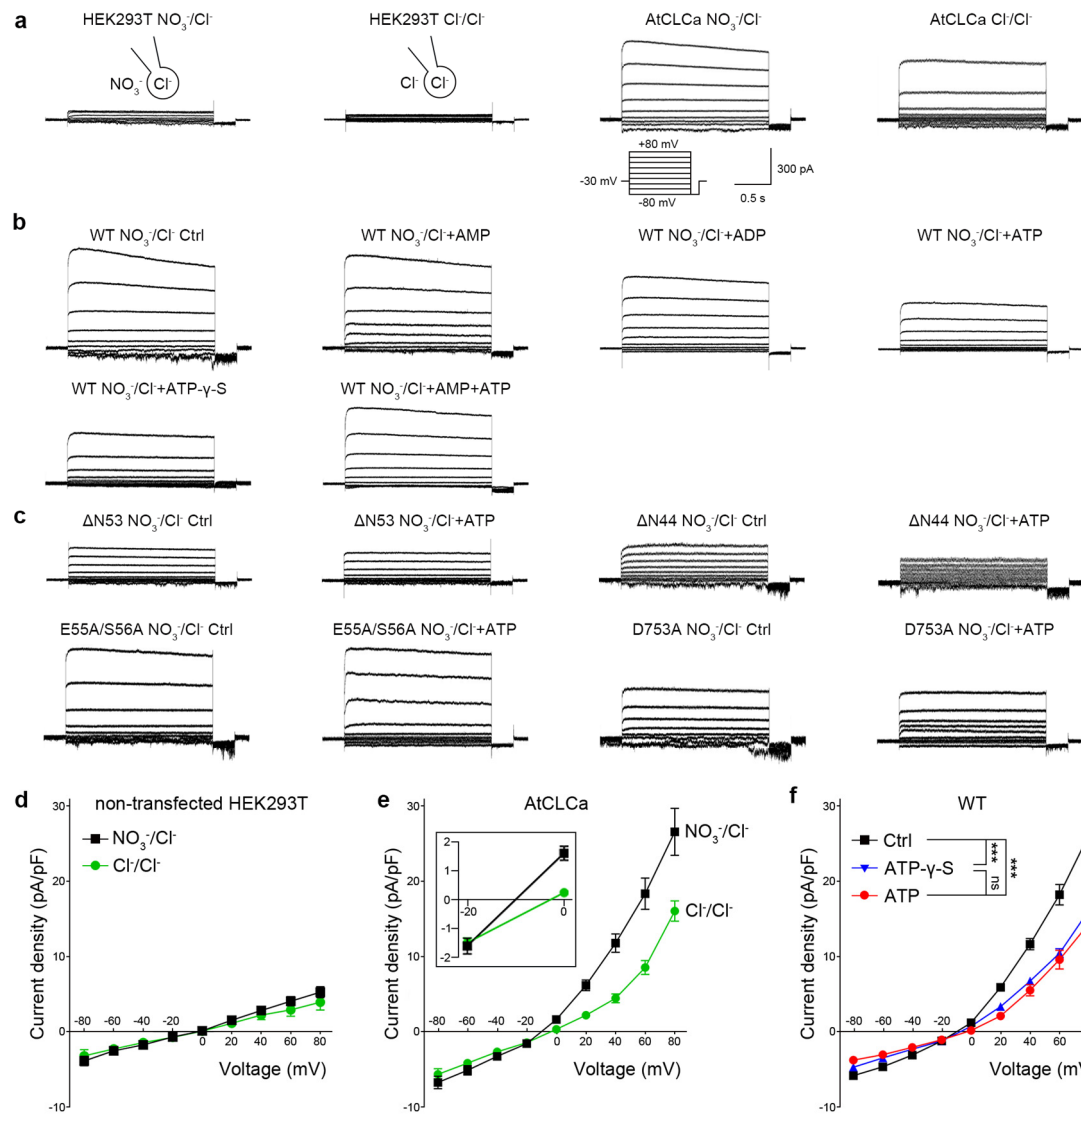

**Supplementary Fig. 6 | Electrophysiological analysis of AtCLCa.**

**a** Representative current traces of HEK293T cells untransfected or transfected with AtCLCa in  $\text{Cl}^-$  and  $\text{NO}_3^-$  bath solutions. The whole-cell currents were evoked by clamping the HEK293T cells for 2-s voltage pulses from  $-80$  to  $+80$  mV in 20-mV steps followed by a repolarizing step to  $-80$  mV. **b** Representative current traces of wild-type AtCLCa with different adenine nucleotides at a concentration of 5 mM added to the pipette solution and the nitrate bath solution used. Ctrl, control. **c** Representative current traces of AtCLCa  $\Delta\text{N53}$  mutant,  $\Delta\text{N44}$  mutant, E55A/S56A mutant and D753A mutant with 5 mM ATP added to the pipette solution and the nitrate bath solution used. Ctrl, control. **d** Comparisons of the  $I-V$  curves of HEK293T cells without AtCLCa transfection in  $\text{Cl}^-$  and  $\text{NO}_3^-$  bath solutions.  $n = 10$  cells for both  $\text{Cl}^-$  and  $\text{NO}_3^-$  bath solutions. Data are mean  $\pm$  s.e.m. **e** Comparisons of the  $I-V$  curves of HEK293T cells



transfected with AtCLCa in  $\text{Cl}^-$  and  $\text{NO}_3^-$  bath solutions.  $n = 18$  cells for both  $\text{Cl}^-$  and  $\text{NO}_3^-$  bath solutions. Data are mean  $\pm$  s.e.m. *Inset*, higher magnification of the  $I-V$  curves to show reversal potentials. **f** Comparisons of the  $I-V$  curves of wild-type AtCLCa with different adenine nucleotides at a concentration of 5 mM added to the pipette solution and the nitrate bath solution used. Ctrl, control.  $n = 20$  (Ctrl, nucleotide free),  $n = 22$  (ATP),  $n = 23$  (ATP- $\gamma$ -S).  $P < 0.0001$  (ATP vs Ctrl),  $P = 0.0002$  (ATP- $\gamma$ -S vs Ctrl),  $P = 0.4161$  (ATP vs ATP- $\gamma$ -S). Data are mean  $\pm$  s.e.m. ( $n > 20$ ). Two-tailed  $t$ -tests were used for significance analysis of the current density at +80 mV. \*\*\*  $P < 0.001$ , ns means no significance difference. Source data are provided as a Source Data file.

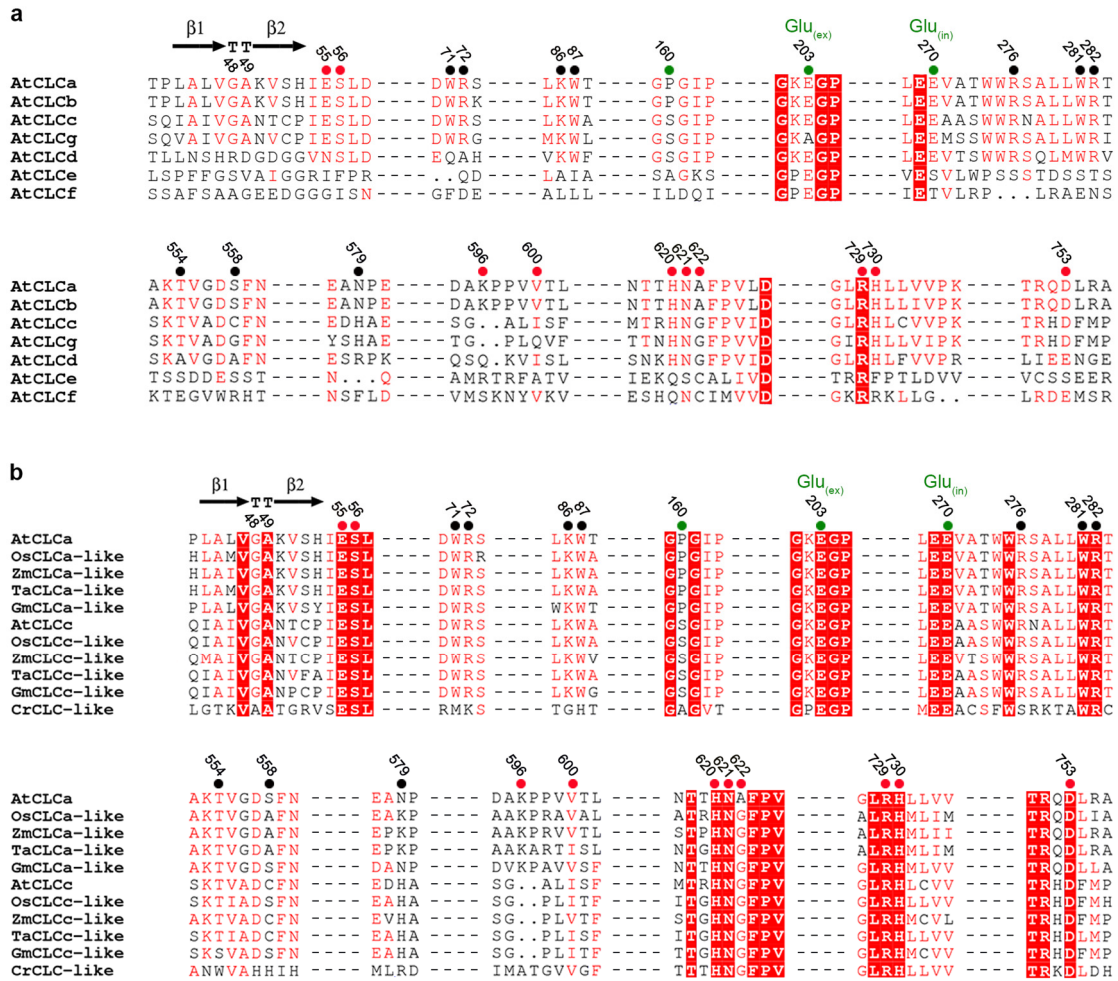

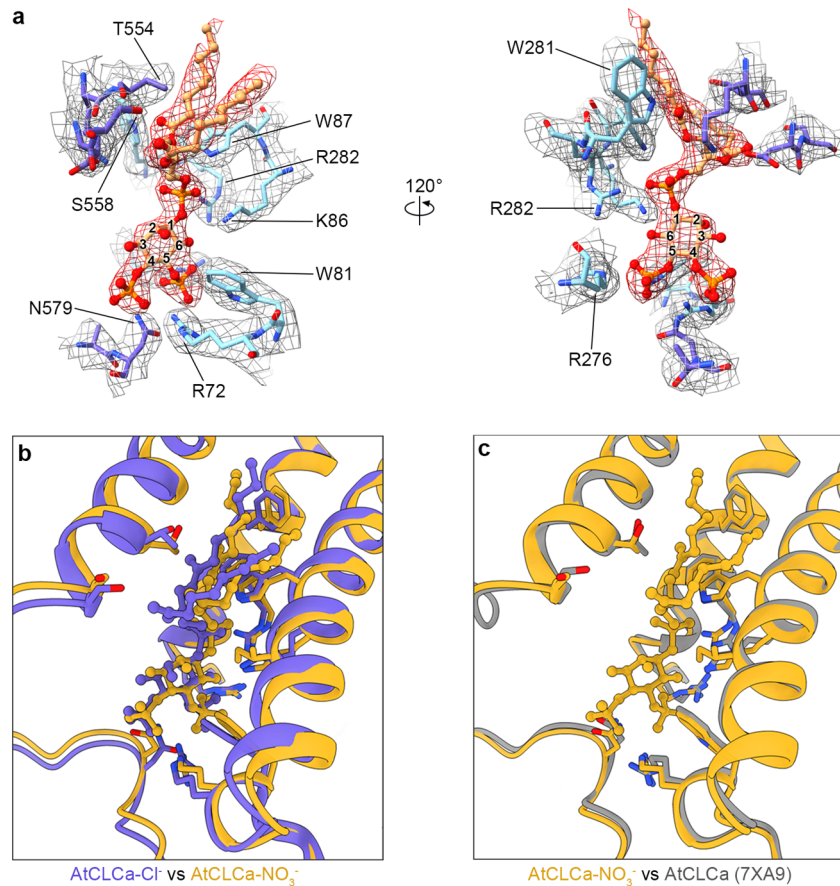

### Supplementary Fig. 8 | PIP<sub>2</sub>-binding site.

**a** EM density of PI(4,5)P<sub>2</sub>-binding site in AtCLCa-Cl<sup>-</sup> is shown at contour level of 2  $\sigma$ . EM density of PI(4,5)P<sub>2</sub> are colored red. Residues from different protomers are shown as blue and cyan sticks, respectively. **b** Comparison of the PI(4,5)P<sub>2</sub>-binding site between AtCLCa-Cl<sup>-</sup> (blue) and AtCLCa-NO<sub>3</sub><sup>-</sup> (golden) structures. **c** Comparison of our PI(4,5)P<sub>2</sub>-bound AtCLCa-NO<sub>3</sub><sup>-</sup> structure (golden) with the recently reported PIP<sub>2</sub>-free AtCLCa structure (7XA9, gray).

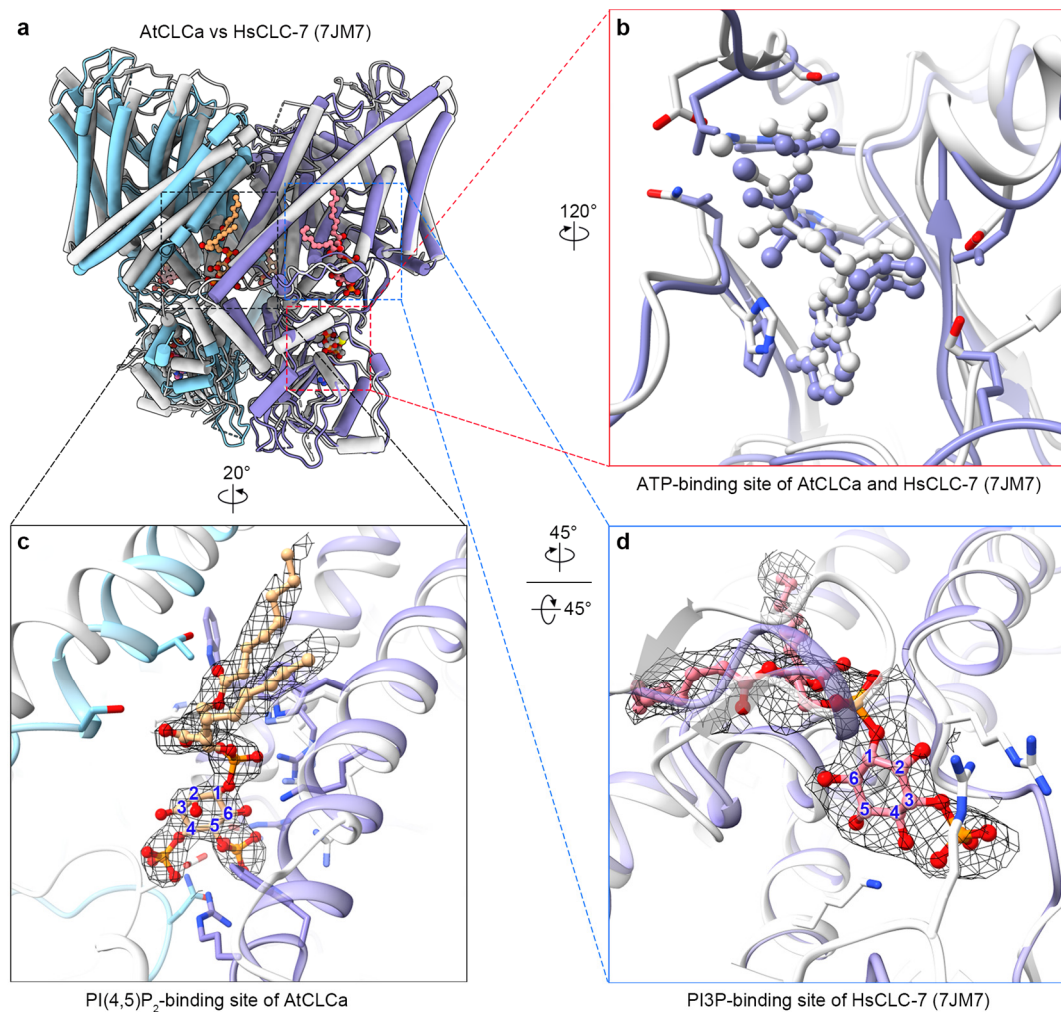

**Supplementary Fig. 9 | Comparison of AtCLCa and HsCLC-7 structures.**

**a** Comparison of the AtCLCa (cyan and blue) and HsCLC-7 (7JM7, gray) structures. **b** A zoom-in view of the ATP-binding site of AtCLCa and HsCLC-7. **c** A zoom-in view of the PI(4,5)P<sub>2</sub>-binding site of AtCLCa. EM density (gray mesh) of PI(4,5)P<sub>2</sub> in AtCLCa-Cl<sup>-</sup> is shown at contour level of 2  $\sigma$ . **d** A zoom-in view of the PI3P-binding site of HsCLC-7 (7JM7, gray). EM density (gray mesh) of PI3P in HsCLC-7 is shown at contour level of 2  $\sigma$ .

**Supplementary Table 1 |Cryo-EM data collection, refinement and validation statistics**

|                                                     | AtCLCa-Cl <sup>-</sup><br>(EMDB-35299)<br>(PDB 8IAB) | AtCLCa-NO <sub>3</sub> <sup>-</sup><br>(EMDB-35300)<br>(PDB 8IAD) |
|-----------------------------------------------------|------------------------------------------------------|-------------------------------------------------------------------|
| <b>Data collection and processing</b>               |                                                      |                                                                   |
| Magnification                                       | 105,000                                              | 105,000                                                           |
| Voltage (kV)                                        | 300                                                  | 300                                                               |
| Electron exposure (e <sup>-</sup> /Å <sup>2</sup> ) | 56.3                                                 | 52                                                                |
| Defocus range (μm)                                  | -1.2 to -2.2                                         | -1.2 to -2.2                                                      |
| Pixel size (Å)                                      | 0.83                                                 | 0.832                                                             |
| Symmetry imposed                                    | C2                                                   | C2                                                                |
| Initial particle images (no.)                       | 876,759                                              | 2,178,441                                                         |
| Final particle images (no.)                         | 135,900                                              | 92,708                                                            |
| Map resolution (Å)                                  | 2.96                                                 | 3.16                                                              |
| FSC threshold                                       | 0.143                                                | 0.143                                                             |
| <b>Refinement</b>                                   |                                                      |                                                                   |
| Initial model used (PDB code)                       | AlphaFold II model                                   | 8IAB                                                              |
| Map sharpening <i>B</i> factor (Å <sup>2</sup> )    | -103.7                                               | -98.9                                                             |
| Model composition                                   |                                                      |                                                                   |
| Non-hydrogen atoms                                  | 11094                                                | 11136                                                             |
| Protein residues                                    | 1408                                                 | 1410                                                              |
| Ligands                                             | 12                                                   | 10                                                                |
| <i>B</i> factors (Å <sup>2</sup> )                  |                                                      |                                                                   |
| Protein                                             | 46.48                                                | 93.77                                                             |
| Ligand                                              | 39.66                                                | 97.89                                                             |
| R.m.s. deviations                                   |                                                      |                                                                   |
| Bond lengths (Å)                                    | 0.004                                                | 0.009                                                             |
| Bond angles (°)                                     | 0.789                                                | 0.997                                                             |
| Validation                                          |                                                      |                                                                   |
| MolProbity score                                    | 1.26                                                 | 1.72                                                              |
| Clashscore                                          | 3.35                                                 | 5.36                                                              |
| Poor rotamers (%)                                   | 0.00                                                 | 0.25                                                              |
| Ramachandran plot                                   |                                                      |                                                                   |
| Favored (%)                                         | 97.28                                                | 93.48                                                             |
| Allowed (%)                                         | 2.72                                                 | 6.38                                                              |
| Disallowed (%)                                      | 0.00                                                 | 0.14                                                              |
