# Supplementary material for: Molecular mechanism underlying regulation of Arabidopsis CLCa transporter by nucleotides and phospholipids
Source: PubMed Central journal article supplement (PMC10423218; doi:10.1038/s41467-023-40624-z), 2023-08-12
Supplement: 41467_2023_40624_MOESM3_ESM.pdf [file 41467_2023_40624_MOESM3_ESM.pdf]

## Reporting Summary

Nature Portfolio wishes to improve the reproducibility of the work that we publish. This form provides structure for consistency and transparency in reporting. For further information on Nature Portfolio policies, see our [Editorial Policies](#) and the [Editorial Policy Checklist](#).

### Statistics

For all statistical analyses, confirm that the following items are present in the figure legend, table legend, main text, or Methods section.

n/a Confirmed

- The exact sample size ( $n$ ) for each experimental group/condition, given as a discrete number and unit of measurement
- A statement on whether measurements were taken from distinct samples or whether the same sample was measured repeatedly
- The statistical test(s) used AND whether they are one- or two-sided  
*Only common tests should be described solely by name; describe more complex techniques in the Methods section.*
- A description of all covariates tested
- A description of any assumptions or corrections, such as tests of normality and adjustment for multiple comparisons
- A full description of the statistical parameters including central tendency (e.g. means) or other basic estimates (e.g. regression coefficient) AND variation (e.g. standard deviation) or associated estimates of uncertainty (e.g. confidence intervals)
- For null hypothesis testing, the test statistic (e.g.  $F$ ,  $t$ ,  $r$ ) with confidence intervals, effect sizes, degrees of freedom and  $P$  value noted  
*Give  $P$  values as exact values whenever suitable.*
- For Bayesian analysis, information on the choice of priors and Markov chain Monte Carlo settings
- For hierarchical and complex designs, identification of the appropriate level for tests and full reporting of outcomes
- Estimates of effect sizes (e.g. Cohen's  $d$ , Pearson's  $r$ ), indicating how they were calculated

*Our web collection on [statistics for biologists](#) contains articles on many of the points above.*

### Software and code

Policy information about [availability of computer code](#)

Data collection

Cryo-EM data collection: EPU, SerialEM  
Electrophysiological data collection: HEAK PatchMaster

Data analysis

Cryo-EM data analysis: MotionCorr2, Gctf, RELION, cryoSPARC  
Model building and analysis: Coot, Phenix, UCSF Chimera, Chimera X, PyMOL, Caver  
Electrophysiological data analysis: Stimfit

For manuscripts utilizing custom algorithms or software that are central to the research but not yet described in published literature, software must be made available to editors and reviewers. We strongly encourage code deposition in a community repository (e.g. GitHub). See the Nature Portfolio [guidelines for submitting code & software](#) for further information.

### Data

Policy information about [availability of data](#)

All manuscripts must include a [data availability statement](#). This statement should provide the following information, where applicable:

- Accession codes, unique identifiers, or web links for publicly available datasets
- A description of any restrictions on data availability
- For clinical datasets or third party data, please ensure that the statement adheres to our [policy](#)

The 3D cryo-EM density maps of AtCLCa-Cl- and AtCLCa-NO3- structures have been deposited in the Electron Microscopy Data Bank under the accession numbers

EMD-35299 and EMD-35300, respectively. Coordinates for AtCLCa-Cl- and AtCLCa-NO3- structure models have been deposited in the Protein Data Bank (PDB) under the accession codes 8IAB and 8IAD, respectively.

## Human research participants

Policy information about [studies involving human research participants and Sex and Gender in Research](#).

|                             |     |
|-----------------------------|-----|
| Reporting on sex and gender | N/A |
| Population characteristics  | N/A |
| Recruitment                 | N/A |
| Ethics oversight            | N/A |

Note that full information on the approval of the study protocol must also be provided in the manuscript.

## Field-specific reporting

Please select the one below that is the best fit for your research. If you are not sure, read the appropriate sections before making your selection.

Life sciences  Behavioural & social sciences  Ecological, evolutionary & environmental sciences

For a reference copy of the document with all sections, see [nature.com/documents/nr-reporting-summary-flat.pdf](https://www.nature.com/documents/nr-reporting-summary-flat.pdf)

## Life sciences study design

All studies must disclose on these points even when the disclosure is negative.

|                 |                                                                                                                                                                                                                                                                                                               |
|-----------------|---------------------------------------------------------------------------------------------------------------------------------------------------------------------------------------------------------------------------------------------------------------------------------------------------------------|
| Sample size     | In electrophysiological recordings, more than 10 cells were tested for WT and mutants. The number was selected based on previous experience in our lab and other studies for the sample size needed to result in statistically relevant comparisons and was sufficient for performing the statistical tests . |
| Data exclusions | No data were excluded from the analysis.                                                                                                                                                                                                                                                                      |
| Replication     | For electrophysiological recording of both WT and mutants, all data have been successfully repeated with at least two batches of samples and all results were similar.                                                                                                                                        |
| Randomization   | Randomization was not employed.                                                                                                                                                                                                                                                                               |
| Blinding        | Blinding was not employed.                                                                                                                                                                                                                                                                                    |

## Reporting for specific materials, systems and methods

We require information from authors about some types of materials, experimental systems and methods used in many studies. Here, indicate whether each material, system or method listed is relevant to your study. If you are not sure if a list item applies to your research, read the appropriate section before selecting a response.

### Materials & experimental systems

| n/a                                 | Involved in the study                                     |
|-------------------------------------|-----------------------------------------------------------|
| <input checked="" type="checkbox"/> | <input type="checkbox"/> Antibodies                       |
| <input type="checkbox"/>            | <input checked="" type="checkbox"/> Eukaryotic cell lines |
| <input checked="" type="checkbox"/> | <input type="checkbox"/> Palaeontology and archaeology    |
| <input checked="" type="checkbox"/> | <input type="checkbox"/> Animals and other organisms      |
| <input checked="" type="checkbox"/> | <input type="checkbox"/> Clinical data                    |
| <input checked="" type="checkbox"/> | <input type="checkbox"/> Dual use research of concern     |

### Methods

| n/a                                 | Involved in the study                           |
|-------------------------------------|-------------------------------------------------|
| <input checked="" type="checkbox"/> | <input type="checkbox"/> ChIP-seq               |
| <input checked="" type="checkbox"/> | <input type="checkbox"/> Flow cytometry         |
| <input checked="" type="checkbox"/> | <input type="checkbox"/> MRI-based neuroimaging |

## Eukaryotic cell lines

---

Policy information about [cell lines and Sex and Gender in Research](#)

|                                                                      |                                                                                                                                        |
|----------------------------------------------------------------------|----------------------------------------------------------------------------------------------------------------------------------------|
| Cell line source(s)                                                  | HEK293T cell line (Catalogue number SCSP-502) was ordered from the cell bank of the Chinese Academy of Sciences.                       |
| Authentication                                                       | The cell line has been validated using the short tandem repeat (STR) profiling method by the cell bank of Chinese Academy of Sciences. |
| Mycoplasma contamination                                             | The cell line has been tested negative for mycoplasma contamination                                                                    |
| Commonly misidentified lines<br>(See <a href="#">ICLAC</a> register) | Not used                                                                                                                               |
